# Supplementary material for: Liquid-phase catalytic growth of graphene
Source: Royal Society of Chemistry journal article supplement (doi:10.1039/d1tc04187h), 2021-11-23
Supplement: d1tc04187h1.pdf [file d1tc04187h1.pdf]

## *Supplementary materials for*

### **Liquid-phase catalytic growth of graphene**

Pin Tian,<sup>a,b,c</sup> Libin Tang,<sup>\*b,c</sup> Jinzhong Xiang,<sup>\*a</sup> Shu Ping Lau,<sup>d</sup> Shouzhang Yuan,<sup>b,c</sup> Dengquan

Yang,<sup>b</sup> Lain-Jong Li<sup>e</sup> and Kar Seng Teng<sup>\*f</sup>

<sup>a</sup> *School of Physics and Astronomy, Yunnan University, Kunming 650091, P.R. China.*

<sup>b</sup> *Kunming Institute of Physics, Kunming 650223, P.R. China.*

<sup>c</sup> *Yunnan Key Laboratory of Advanced Photoelectric Materials & Devices, Kunming 650223, P.R. China.*

<sup>d</sup> *Department of Applied Physics, The Hong Kong Polytechnic University, Hong Kong SAP, P.R. China.*

<sup>e</sup> *School of Materials Science and Engineering, University of New South Wales, Sydney 2052, Australia.*

<sup>f</sup> *Department of Electronic and Electrical Engineering, Swansea University, Bay Campus, Fabian Way, Swansea SA1 8EN,*

*United Kingdom.*

*Correspondence and requests for materials should be addressed to L.T. (email: [sscitang@163.com](mailto:sscitang@163.com)) or to J.X. (email:*

*[jzhiang@ynu.edu.cn](mailto:jzhiang@ynu.edu.cn)) or to K.S.T (email: [k.s.teng@swansea.ac.uk](mailto:k.s.teng@swansea.ac.uk)).*

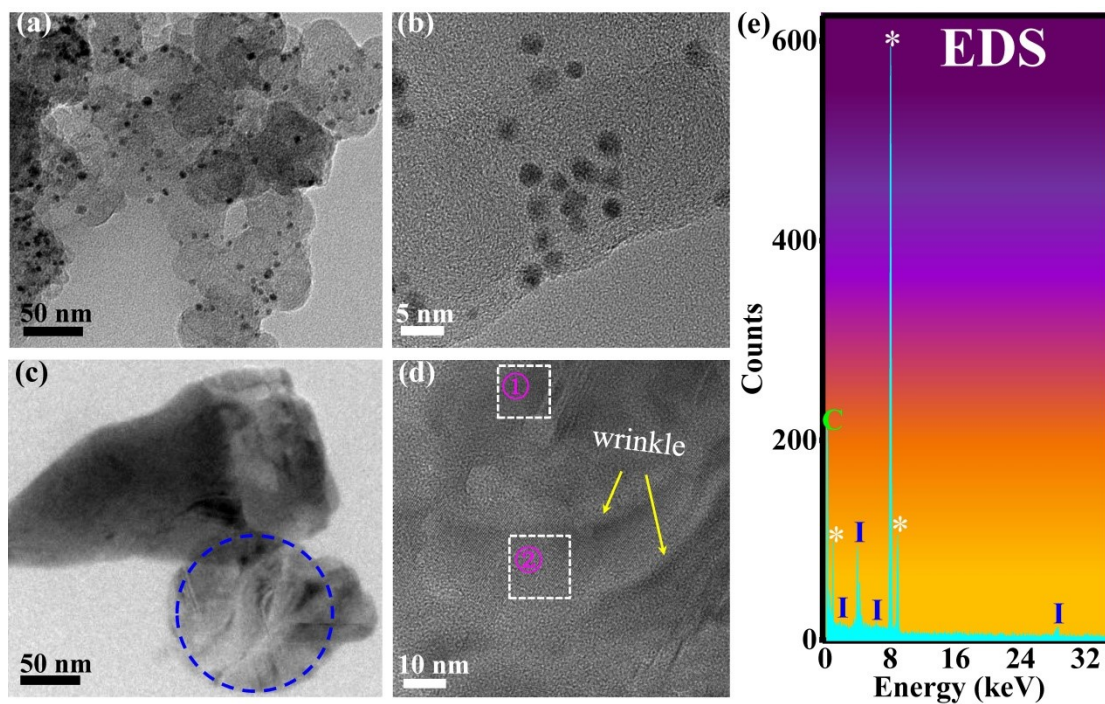

**Fig. S1.** TEM images of GQDs and liquid-phase catalytic graphene, and energy dispersive spectroscopy (EDS) characterization of graphene. **(a)** TEM image of GQDs. **(b)** High resolution TEM image of GQDs. **(c)** TEM image of graphene flakes produced by the liquid-phase catalytic method. **(d)** The high resolution TEM image of the graphene flakes exhibiting wrinkles. **(e)** EDS measurement of region ② in Fig. 2(a). Iodine element was presented in the graphene solution. The white \* in the EDS spectrum represent copper element from the TEM support grids.

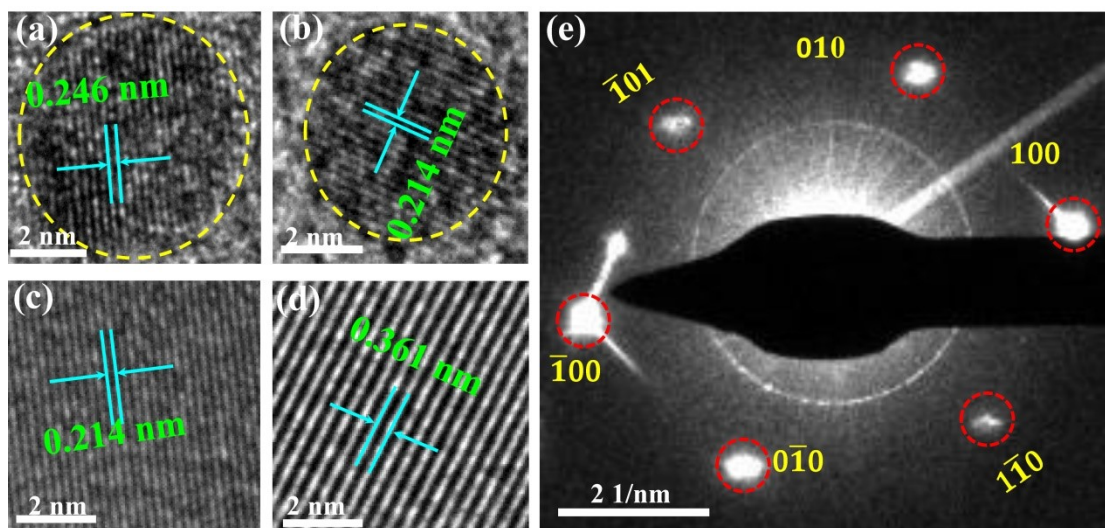

**Fig. S2.** TEM images of GQDs and structural characterization of liquid-phase catalytic graphene. (a) and (b) High-resolution TEM images of GQDs with lattice spacing of 0.246 nm and 0.214 nm, respectively, which are characteristic spacing of graphene. (c) and (d) Local amplification images of region ① and ② in Fig. S1(d), which show the lattice fringes of graphene flakes. The spacing of 0.214 nm and 0.361 are characteristic spacing of graphene at in-plane and c-axis directions respectively. This indicates that the graphene flakes prepared by liquid-phase catalysis is of layered structure. (e) Selective area electron diffraction (SAED) pattern from the blue dotted circle area in Fig. S1(c). The hexagonal pattern is the characteristic diffraction spots of graphene, suggesting that the liquid-phase catalytic graphene exhibited excellent crystallinity.

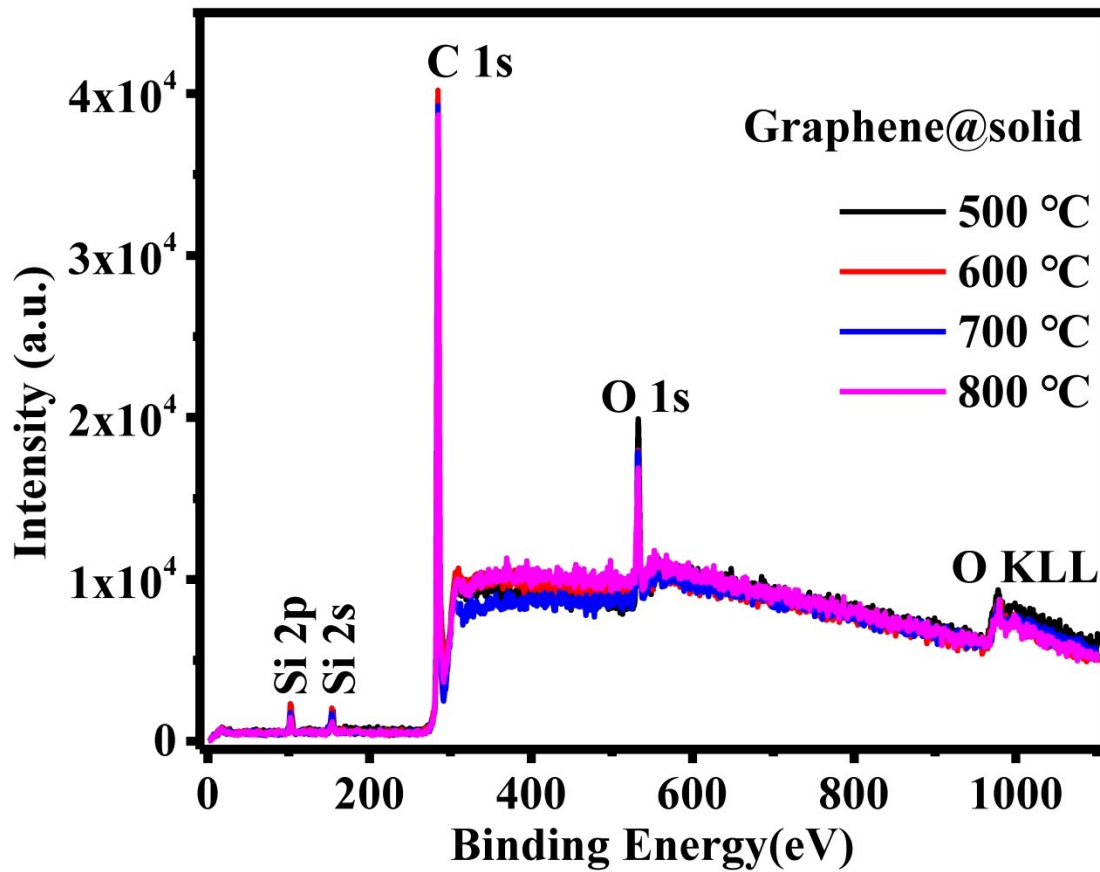

Fig. S3. XPS full spectra of solid graphene films annealed at different temperatures (500°C,600°C,700°C and 800°C). Iodine was not found on the graphene film after the annealing treatment, which had successfully removed the catalyst.

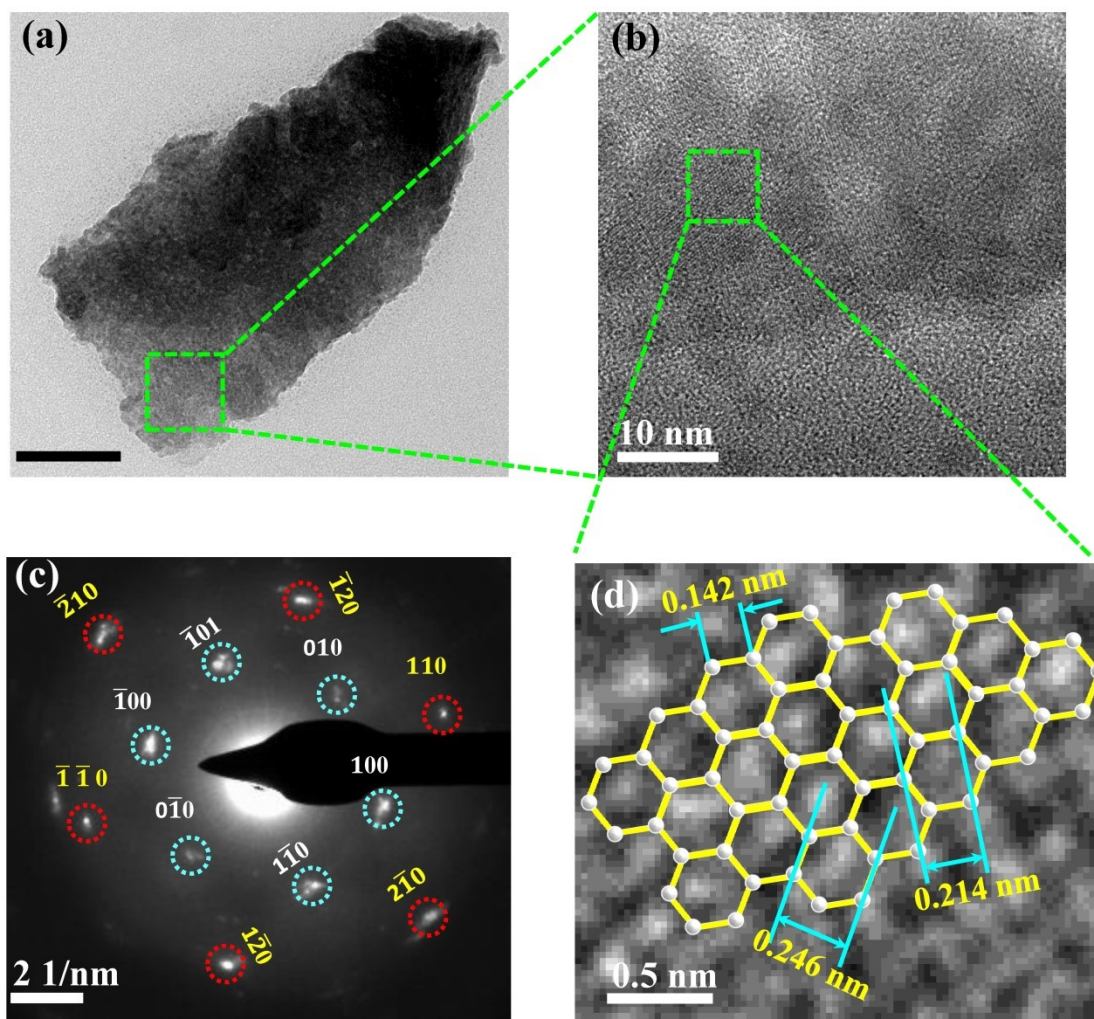

**Fig. S4.** TEM characterization of solid graphene film prepared by annealing at 600°C. **(a)** TEM image of graphene film, which exhibited layered structure and good homogeneity. **(b)** An enlarged TEM image of the green square area in Fig. **(a)** revealing good crystallinity at the graphene film. **(c)** Selective area electron diffraction (SAED) pattern from the green square region in Fig. **(a)** and a hexagonal pattern demonstrated good crystallinity and homogeneity of the graphene film. **(d)** High-resolution TEM image on the green square area of Fig. **(b)**. The white dots show the honeycomb-shaped graphene structure consisting of six carbon atoms as shown in the inset.

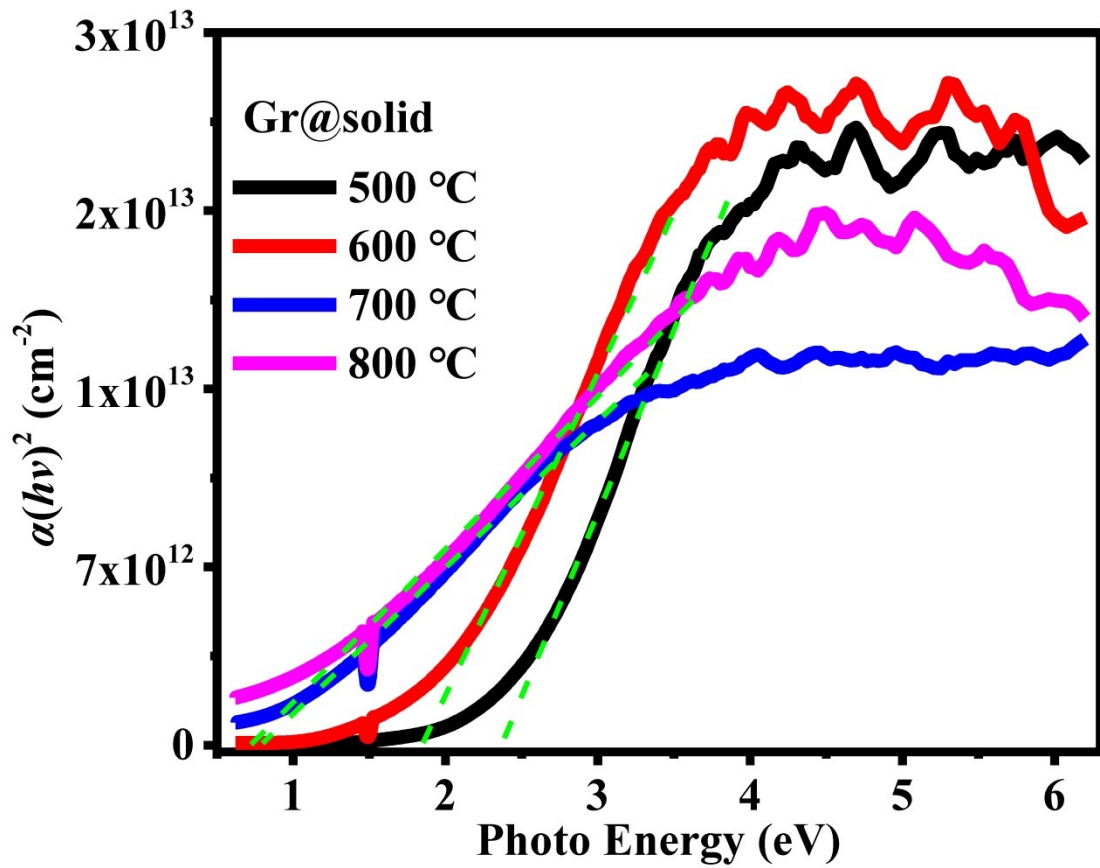

Fig. S5. Plots of optical absorption against photon energy of solid graphene film annealed at different temperatures (500°C, 600°C, 700°C and 800°C). Optical absorption coefficient and optical bandgap of the graphene film was calculated using the plots. The plots also show bandgap modulation of the film due to different annealing temperatures.

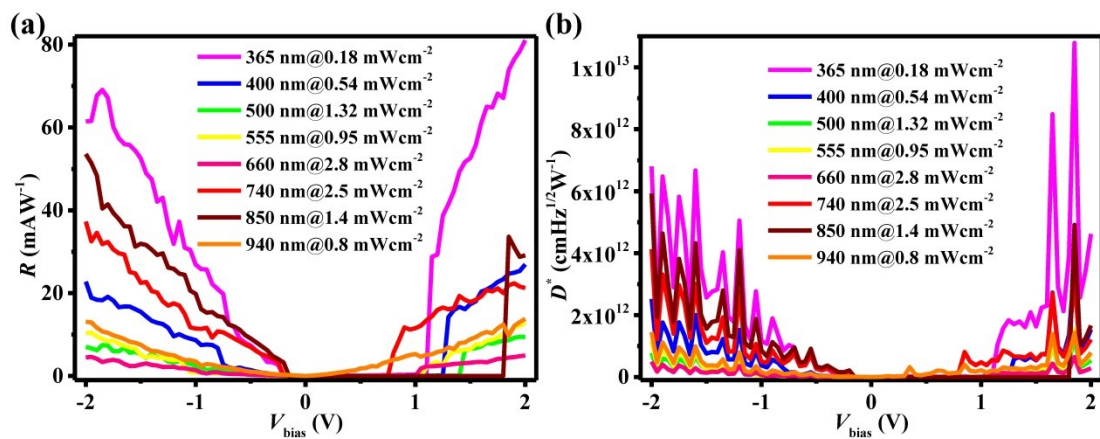

Fig. S6. Performance of photodetector based on liquid-phase catalytic graphene under light illumination by LEDs with different wavelength (365-940 nm) at certain power density. (a) and (b) The detectivity and responsivity vs applied voltage curves of the photodetector, respectively.

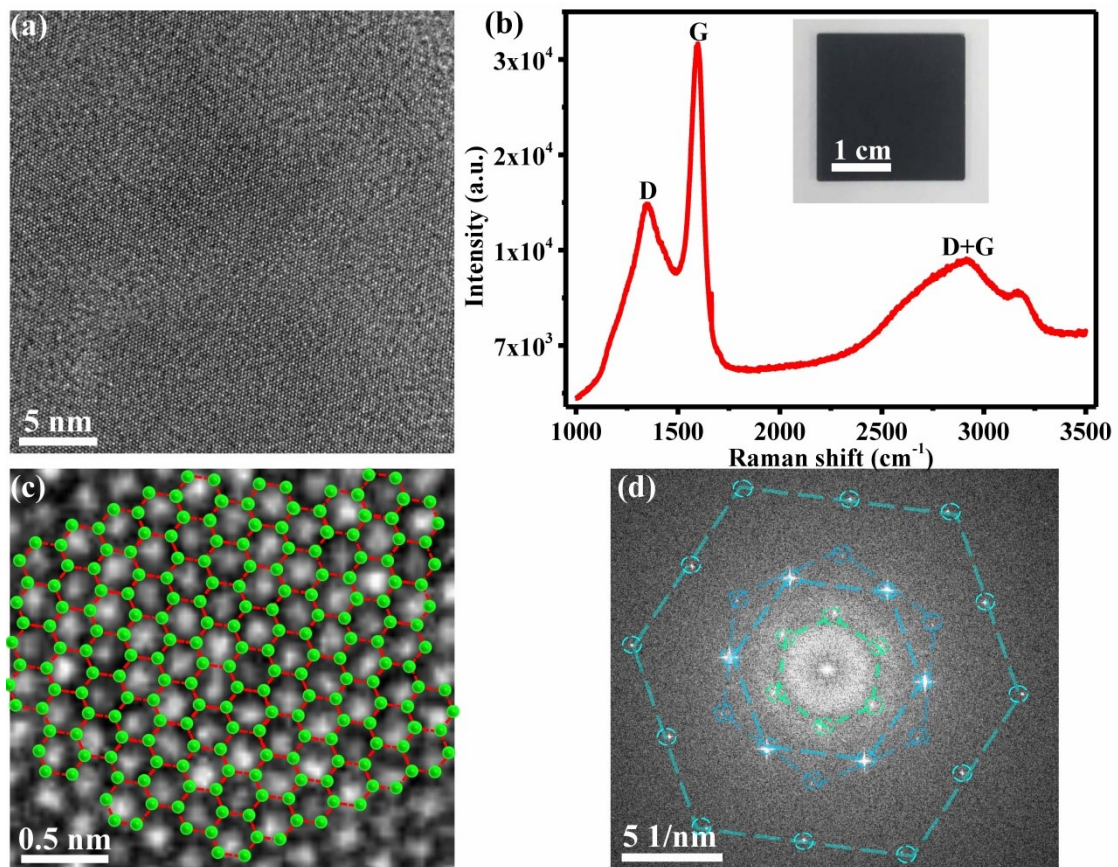

**Fig. S7.** Characterization of defects in liquid-phase catalyzed graphene. **(a)** HRTEM image of graphene grown using the liquid-phase catalysis method; **(b)** Raman spectra of solid graphene films (Inset: optical image of solid graphene films coated on quartz substrate); **(c)** HRTEM image of graphene from Fig. **(a)**. The green dots show the honeycomb-shaped graphene structure consisting of six carbon atoms as shown in the inset; **(d)** Selected area FFT image from Fig. **(a)**.

**Table S1.** Parameters used in the calculation of the optical bandgap from the plots in Supplementary Fig 5.

| Annealing Temperature(°C) | Intercept | Slope | Optical gap (eV) |
|---------------------------|-----------|-------|------------------|
| 500                       | -5.013    | 2.282 | 2.20             |
| 600                       | -4.123    | 2.308 | 1.78             |
| 700                       | -0.820    | 1.061 | 0.77             |
| 800                       | -0.742    | 1.101 | 0.67             |

## Supplementary Notes

### Samples preparation for TEM characterization

TEM characterization on Gr@solid: The Gr@solid was etched using HF solution, and the sample was separated from substrate in deionized water. Finally, the sample was coated on the copper nets without the use of carbon thin film for measurement.

TEM characterization on precursor solution: The solution was mixed with a mixture of alcohol and deionized water (having a volume ratio of 10:3). The final mixture has a volume ratio 13:2 of precursor solution and alcohol-water mixture. It was drop-casted on the copper nets with carbon thin film for measurement.

### Supplementary Discussion

The relationship between the absorption and absorption coefficient of the material is as follows *Eq. (1)*:

$$A = \alpha \cdot c \cdot d \quad (1)$$

where  $A$  is absorption,  $\alpha$  is absorption coefficient,  $c$  is concentration and  $d$  is thickness. The



concentration ( $c$ ) of the solid graphene film was denoted as 1. The thickness of the film was obtained from the AFM measurement in Fig. 3(b). Thus the relationship between absorption coefficient and wavelength can be calculated from the UV-Visible-near-infrared absorption spectroscopy, where wavelength ( $\lambda$ ) = 1240 (nm)/ $h\nu$ .

Considering graphene is a direct bandgap material, the optical bandgap ( $E_g$ ) of the material can be calculated if the photon energy ( $h\nu$ )  $\geq E_g$  using Eq. (2).

$$\alpha(h\nu) = C (h\nu - E_g)^{1/2} \quad (2)$$

where,  $C$  is a constant,  $\alpha$  is absorption coefficient and  $h\nu$  is photon energy.
